# Supplementary material for: Assessing the difference of tolerance and phytoremediation potential in mercury contaminated soil of a non-food energy crop, Helianthus tuberosus L. (Jerusalem artichoke)
Source: PeerJ. 2018 Feb 1;6:e4325. doi: 10.7717/peerj.4325 (PMC5797682; doi:10.7717/peerj.4325)
Supplement: Data S4 [file peerj-06-4325-s005.xlsx]

## Sheet: Sheet1
		Number of emergence				Number of death
	Hg	2nd week	4th week	6th week	8th week	20th week
LZJ047	CK	16	30	30	30	0
	0.15	15	29	30	30	0
	1	13	29	30	30	0
	5	6	20	29	30	4
	10	3	16	23	27	23
LZJ119	CK	18	30	30	30	0
	0.15	19	25	30	30	0
	1	12	26	30	30	0
	5	8	23	28	28	0
	10	5	21	25	27	7
LZJ033	CK	17	29	30	30	0
	0.15	18	30	30	30	0
	1	14	29	30	30	0
	5	7	29	30	30	0
	10	6	28	27	28	6
Total number was 30
